# Supplementary material
Source: PubMed Central journal article supplement (PMC6820136)
Supplement: NIHMS1055436-supplement-Figure.pdf [file NIHMS1055436-supplement-Figure.pdf]

In the format provided by the authors and unedited.

# Emerging structural insights into glycosyltransferase-mediated synthesis of glycans

Kelley W. Moremen<sup>✉</sup>\* and Robert S. Haltiwanger<sup>✉</sup>\*

---

Complex Carbohydrate Research Center, University of Georgia, Athens, GA, USA. \*e-mail: [moremen@uga.edu](mailto:moremen@uga.edu); [halti@uga.edu](mailto:halti@uga.edu)

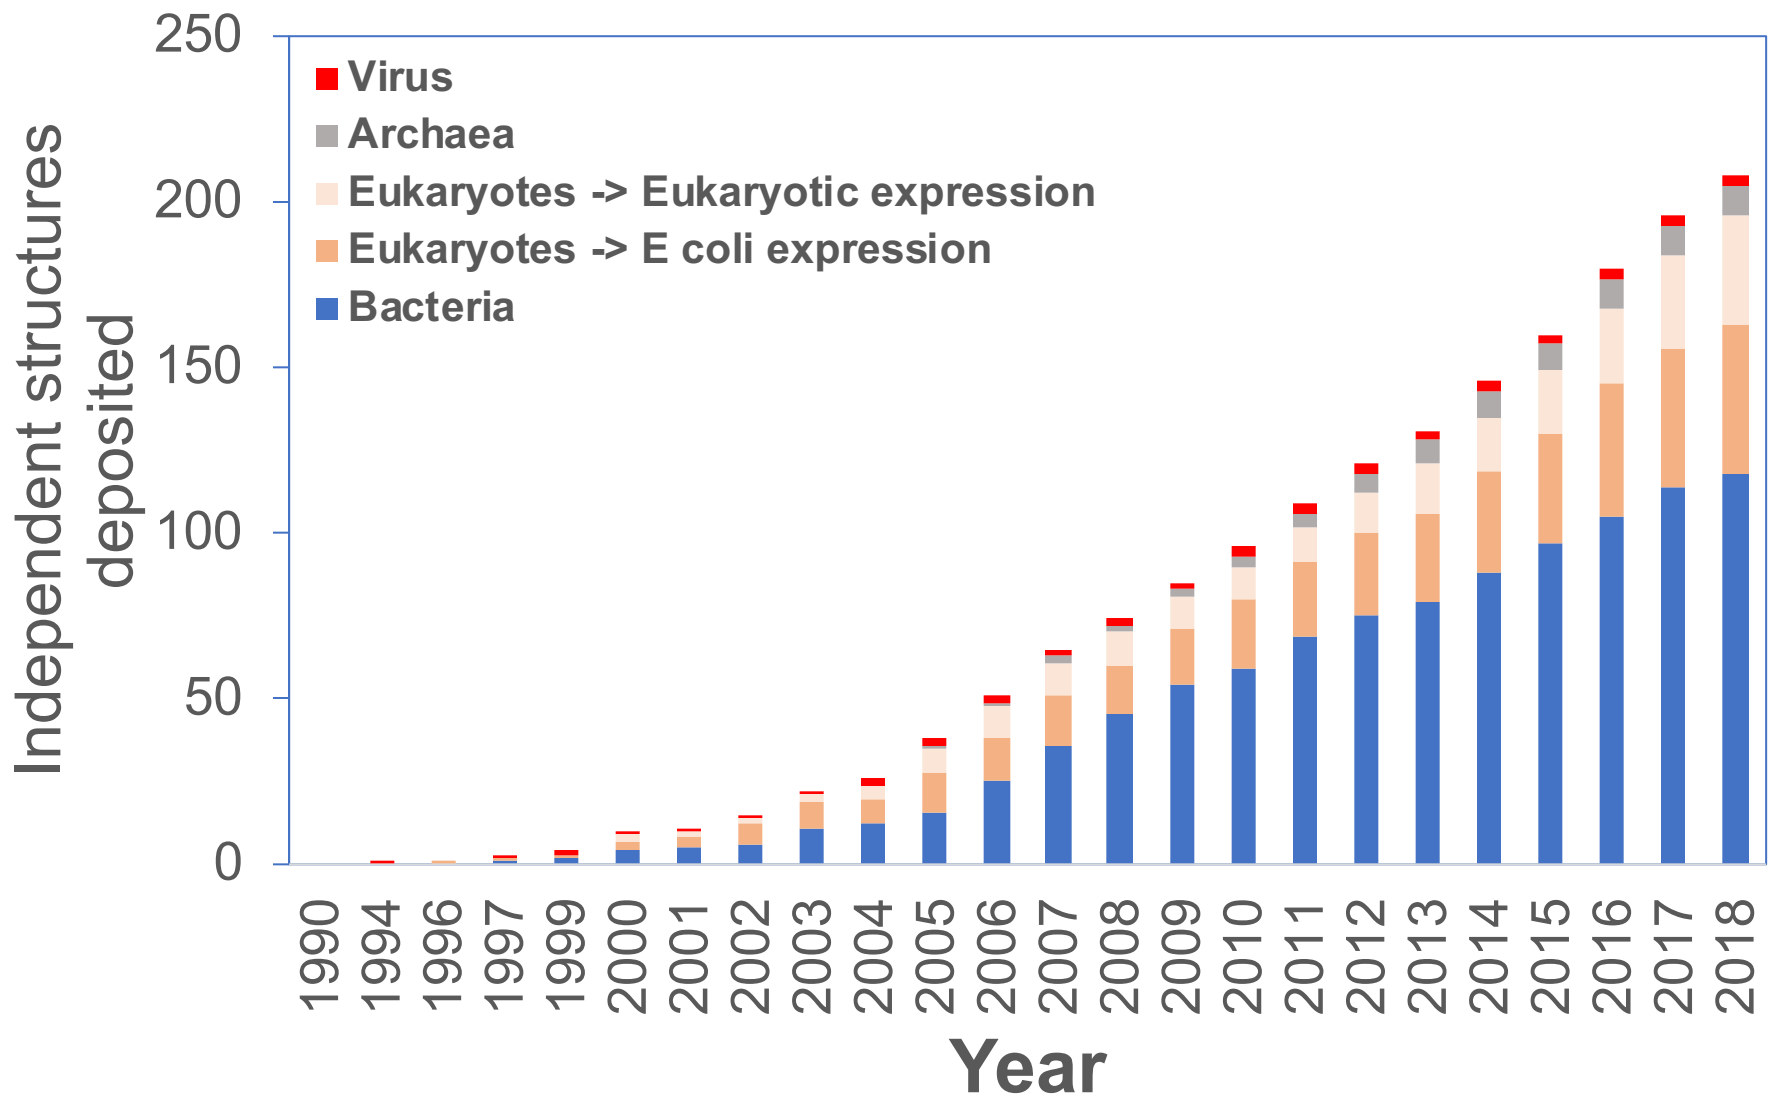

**Supplementary Figure 1: Timeline of published GT structures.** The GT structures in PDB from all domains of life were collated in **Supplementary Data Set 1** and the first deposited structure for each protein, domains of life for each coding region (bacterial, archaeal, eukaryotic, and viral), and the expression approach for each protein (bacterial or eukaryotic expression) are indicated. The graph displays the running total for all GT structures in each class deposited per year. Only the date of the first published structure is plotted in the figure, but **Supplementary Data Set 1** contains information on all subsequent published structures for the given coding region.
