# Supplementary material
Source: PubMed Central journal article supplement (PMC6820136)
Supplement: NIHMS1055436-supplement-Supp_Dataset.pdf [file NIHMS1055436-supplement-Supp_Dataset.pdf]

Supplementary Data Set 1: Summary of Glycosyltransferase structures in PDB (January 2019)

Glycosyltransferase structures in PDB as of January 1, 2019 have been previously cataloged in the CAZy database (1) and were used to populate the table below. Structure entries in the table are organized by CAZy family. Annotation information was provided for each protein structure, including gene symbol, protein name, and UniProt accession number (all collected from the respective UniProt entry (2)), species source and Kingdom for the coding region, and the species source of the expression system (derived from the respective PDB record (3)). The PDB ID codes for the respective protein structures are listed in many instances there are multiple PDB files deposited for a given protein with the year of first deposit for the protein coding region, and the year(s) of subsequent deposits of protein structures. The protein fold class designation was derived from the respective CAZy family record and visual inspection of the protein structure. The glycosyltransferase mechanism (inverting or retaining catalytic mechanisms) were derived from the respective CAZy family record or the primary citation of the structure. The dependence for a metal cation in the catalytic mechanism (Metal dep) was determined by the requirement of a metal for binding the donor analog in the respective protein structure for at least one member of the respective CAZy family. Donor and acceptor ligand structures were listed for analog complexes that bound to the respective substrates and do not include molecules bound to inhibitory or allosteric sites. Publications of the respective structures are listed by digital object identifiers (doi) based on citation information in the PDB record. If a publication doi is not available, then a PubMed ID is listed. In some instances no publication is listed if the Literature field of the PDB record indicates that the structure is to be published.

| CAZy family | Gene symbol                             | Protein name                            | Uniprot              | Species              | Kingdom  | Expression | PDB ID                 | Year first deposited | Year subsequent deposits | Fold class | Mechanism | Metal dep | Donor ligand analog | Acceptor ligand analog | Pub doi or PubMed ID                             |
|-------------|-----------------------------------------|-----------------------------------------|----------------------|----------------------|----------|------------|------------------------|----------------------|--------------------------|------------|-----------|-----------|---------------------|------------------------|--------------------------------------------------|
| 1           | ase2                                    | End2 glucosyltransferase                | A0M999               | Actinomyces viscosus | Bacteria | E. coli    | 5DQ2                   | 2015                 |                          | GT-B       | inverting | N.D.      |                     |                        |                                                  |
|             | glfA                                    | ETP-epi-sialosyltransferase             | P9558                | Amphibacillus oryzae | Bacteria | E. coli    | 1P93, 1P94, 1B61, 1B67 | 2003                 | 2009                     | GT-B       | inverting | no        | UDP-Glc-UDP         | Glc, sialosamine       | 10.1073/pdb.13337720.10.10161.chembl.2009.04.031 |
|             | glfB                                    | Vancomycin-sulfonyl glycosyltransferase | P9559                | Amphibacillus oryzae | Bacteria | E. coli    | 1B68                   | 2001                 |                          | GT-B       | inverting | no        |                     |                        | 10.1016/S0969-2196(01)00616-5                    |
|             | glfC                                    | Vancomycin-sulfonyl glycosyltransferase | P9560                | Amphibacillus oryzae | Bacteria | E. coli    | 1B69                   | 2001                 |                          | GT-B       | inverting | no        |                     |                        |                                                  |
|             | glfD                                    | Vancomycin-sulfonyl glycosyltransferase | P9561                | Amphibacillus oryzae | Bacteria | E. coli    | 1B70                   | 2001                 |                          | GT-B       | inverting | no        |                     |                        |                                                  |
|             | glfE                                    | Vancomycin-sulfonyl glycosyltransferase | P9562                | Amphibacillus oryzae | Bacteria | E. coli    | 1B71                   | 2001                 |                          | GT-B       | inverting | no        |                     |                        |                                                  |
|             | glfF                                    | Vancomycin-sulfonyl glycosyltransferase | P9563                | Amphibacillus oryzae | Bacteria | E. coli    | 1B72                   | 2001                 |                          | GT-B       | inverting | no        |                     |                        |                                                  |
|             | glfG                                    | Vancomycin-sulfonyl glycosyltransferase | P9564                | Amphibacillus oryzae | Bacteria | E. coli    | 1B73                   | 2001                 |                          | GT-B       | inverting | no        |                     |                        |                                                  |
|             | glfH                                    | Vancomycin-sulfonyl glycosyltransferase | P9565                | Amphibacillus oryzae | Bacteria | E. coli    | 1B74                   | 2001                 |                          | GT-B       | inverting | no        |                     |                        |                                                  |
|             | glfI                                    | Vancomycin-sulfonyl glycosyltransferase | P9566                | Amphibacillus oryzae | Bacteria | E. coli    | 1B75                   | 2001                 |                          | GT-B       | inverting | no        |                     |                        |                                                  |
|             | glfJ                                    | Vancomycin-sulfonyl glycosyltransferase | P9567                | Amphibacillus oryzae | Bacteria | E. coli    | 1B76                   | 2001                 |                          | GT-B       | inverting | no        |                     |                        |                                                  |
|             | glfK                                    | Vancomycin-sulfonyl glycosyltransferase | P9568                | Amphibacillus oryzae | Bacteria | E. coli    | 1B77                   | 2001                 |                          | GT-B       | inverting | no        |                     |                        |                                                  |
|             | glfL                                    | Vancomycin-sulfonyl glycosyltransferase | P9569                | Amphibacillus oryzae | Bacteria | E. coli    | 1B78                   | 2001                 |                          | GT-B       | inverting | no        |                     |                        |                                                  |
|             | glfM                                    | Vancomycin-sulfonyl glycosyltransferase | P9570                | Amphibacillus oryzae | Bacteria | E. coli    | 1B79                   | 2001                 |                          | GT-B       | inverting | no        |                     |                        |                                                  |
|             | glfN                                    | Vancomycin-sulfonyl glycosyltransferase | P9571                | Amphibacillus oryzae | Bacteria | E. coli    | 1B80                   | 2001                 |                          | GT-B       | inverting | no        |                     |                        |                                                  |
|             | glfO                                    | Vancomycin-sulfonyl glycosyltransferase | P9572                | Amphibacillus oryzae | Bacteria | E. coli    | 1B81                   | 2001                 |                          | GT-B       | inverting | no        |                     |                        |                                                  |
|             | glfP                                    | Vancomycin-sulfonyl glycosyltransferase | P9573                | Amphibacillus oryzae | Bacteria | E. coli    | 1B82                   | 2001                 |                          | GT-B       | inverting | no        |                     |                        |                                                  |
|             | glfQ                                    | Vancomycin-sulfonyl glycosyltransferase | P9574                | Amphibacillus oryzae | Bacteria | E. coli    | 1B83                   | 2001                 |                          | GT-B       | inverting | no        |                     |                        |                                                  |
|             | glfR                                    | Vancomycin-sulfonyl glycosyltransferase | P9575                | Amphibacillus oryzae | Bacteria | E. coli    | 1B84                   | 2001                 |                          | GT-B       | inverting | no        |                     |                        |                                                  |
|             | glfS                                    | Vancomycin-sulfonyl glycosyltransferase | P9576                | Amphibacillus oryzae | Bacteria | E. coli    | 1B85                   | 2001                 |                          | GT-B       | inverting | no        |                     |                        |                                                  |
|             | glfT                                    | Vancomycin-sulfonyl glycosyltransferase | P9577                | Amphibacillus oryzae | Bacteria | E. coli    | 1B86                   | 2001                 |                          | GT-B       | inverting | no        |                     |                        |                                                  |
|             | glfU                                    | Vancomycin-sulfonyl glycosyltransferase | P9578                | Amphibacillus oryzae | Bacteria | E. coli    | 1B87                   | 2001                 |                          | GT-B       | inverting | no        |                     |                        |                                                  |
|             | glfV                                    | Vancomycin-sulfonyl glycosyltransferase | P9579                | Amphibacillus oryzae | Bacteria | E. coli    | 1B88                   | 2001                 |                          | GT-B       | inverting | no        |                     |                        |                                                  |
|             | glfW                                    | Vancomycin-sulfonyl glycosyltransferase | P9580                | Amphibacillus oryzae | Bacteria | E. coli    | 1B89                   | 2001                 |                          | GT-B       | inverting | no        |                     |                        |                                                  |
|             | glfX                                    | Vancomycin-sulfonyl glycosyltransferase | P9581                | Amphibacillus oryzae | Bacteria | E. coli    | 1B90                   | 2001                 |                          | GT-B       | inverting | no        |                     |                        |                                                  |
| glfY        | Vancomycin-sulfonyl glycosyltransferase | P9582                                   | Amphibacillus oryzae | Bacteria             | E. coli  | 1B91       | 2001                   |                      | GT-B                     | inverting  | no        |           |                     |                        |                                                  |
| glfZ        | Vancomycin-sulfonyl glycosyltransferase | P9583                                   | Amphibacillus oryzae | Bacteria             | E. coli  | 1B92       | 2001                   |                      | GT-B                     | inverting  | no        |           |                     |                        |                                                  |
| glfAA       | Vancomycin-sulfonyl glycosyltransferase | P9584                                   | Amphibacillus oryzae | Bacteria             | E. coli  | 1B93       | 2001                   |                      | GT-B                     | inverting  | no        |           |                     |                        |                                                  |
| glfAB       | Vancomycin-sulfonyl glycosyltransferase | P9585                                   | Amphibacillus oryzae | Bacteria             | E. coli  | 1B94       | 2001                   |                      | GT-B                     | inverting  | no        |           |                     |                        |                                                  |
| glfAC       | Vancomycin-sulfonyl glycosyltransferase | P9586                                   | Amphibacillus oryzae | Bacteria             | E. coli  | 1B95       | 2001                   |                      | GT-B                     | inverting  | no        |           |                     |                        |                                                  |
| glfAD       | Vancomycin-sulfonyl glycosyltransferase | P9587                                   | Amphibacillus oryzae | Bacteria             | E. coli  | 1B96       | 2001                   |                      | GT-B                     | inverting  | no        |           |                     |                        |                                                  |
| glfAE       | Vancomycin-sulfonyl glycosyltransferase | P9588                                   | Amphibacillus oryzae | Bacteria             | E. coli  | 1B97       | 2001                   |                      | GT-B                     | inverting  | no        |           |                     |                        |                                                  |
| glfAF       | Vancomycin-sulfonyl glycosyltransferase | P9589                                   | Amphibacillus oryzae | Bacteria             | E. coli  | 1B98       | 2001                   |                      | GT-B                     | inverting  | no        |           |                     |                        |                                                  |
| glfAG       | Vancomycin-sulfonyl glycosyltransferase | P9590                                   | Amphibacillus oryzae | Bacteria             | E. coli  | 1B99       | 2001                   |                      | GT-B                     | inverting  | no        |           |                     |                        |                                                  |
| glfAH       | Vancomycin-sulfonyl glycosyltransferase | P9591                                   | Amphibacillus oryzae | Bacteria             | E. coli  | 1B00       | 2001                   |                      | GT-B                     | inverting  | no        |           |                     |                        |                                                  |
| glfAI       | Vancomycin-sulfonyl glycosyltransferase | P9592                                   | Amphibacillus oryzae | Bacteria             | E. coli  | 1B01       | 2001                   |                      | GT-B                     | inverting  | no        |           |                     |                        |                                                  |
| glfAJ       | Vancomycin-sulfonyl glycosyltransferase | P9593                                   | Amphibacillus oryzae | Bacteria             | E. coli  | 1B02       | 2001                   |                      | GT-B                     | inverting  | no        |           |                     |                        |                                                  |
| glfAK       | Vancomycin-sulfonyl glycosyltransferase | P9594                                   | Amphibacillus oryzae | Bacteria             | E. coli  | 1B03       | 2001                   |                      | GT-B                     | inverting  | no        |           |                     |                        |                                                  |
| glfAL       | Vancomycin-sulfonyl glycosyltransferase | P9595                                   | Amphibacillus oryzae | Bacteria             | E. coli  | 1B04       | 2001                   |                      | GT-B                     | inverting  | no        |           |                     |                        |                                                  |
| glfAM       | Vancomycin-sulfonyl glycosyltransferase | P9596                                   | Amphibacillus oryzae | Bacteria             | E. coli  | 1B05       | 2001                   |                      | GT-B                     | inverting  | no        |           |                     |                        |                                                  |
| glfAN       | Vancomycin-sulfonyl glycosyltransferase | P9597                                   | Amphibacillus oryzae | Bacteria             | E. coli  | 1B06       | 2001                   |                      | GT-B                     | inverting  | no        |           |                     |                        |                                                  |
| glfAO       | Vancomycin-sulfonyl glycosyltransferase | P9598                                   | Amphibacillus oryzae | Bacteria             | E. coli  | 1B07       | 2001                   |                      | GT-B                     | inverting  | no        |           |                     |                        |                                                  |
| glfAP       | Vancomycin-sulfonyl glycosyltransferase | P9599                                   | Amphibacillus oryzae | Bacteria             | E. coli  | 1B08       | 2001                   |                      | GT-B                     | inverting  | no        |           |                     |                        |                                                  |
| glfAQ       | Vancomycin-sulfonyl glycosyltransferase | P9600                                   | Amphibacillus oryzae | Bacteria             | E. coli  | 1B09       | 2001                   |                      | GT-B                     | inverting  | no        |           |                     |                        |                                                  |
| glfAR       | Vancomycin-sulfonyl glycosyltransferase | P9601                                   | Amphibacillus oryzae | Bacteria             | E. coli  | 1B10       | 2001                   |                      | GT-B                     | inverting  | no        |           |                     |                        |                                                  |
| glfAS       | Vancomycin-sulfonyl glycosyltransferase | P9602                                   | Amphibacillus oryzae | Bacteria             | E. coli  | 1B11       | 2001                   |                      | GT-B                     | inverting  | no        |           |                     |                        |                                                  |
| glfAT       | Vancomycin-sulfonyl glycosyltransferase | P9603                                   | Amphibacillus oryzae | Bacteria             | E. coli  | 1B12       | 2001                   |                      | GT-B                     | inverting  | no        |           |                     |                        |                                                  |
| glfAU       | Vancomycin-sulfonyl glycosyltransferase | P9604                                   | Amphibacillus oryzae | Bacteria             | E. coli  | 1B13       | 2001                   |                      | GT-B                     | inverting  | no        |           |                     |                        |                                                  |
| glfAV       | Vancomycin-sulfonyl glycosyltransferase | P9605                                   | Amphibacillus oryzae | Bacteria             | E. coli  | 1B14       | 2001                   |                      | GT-B                     | inverting  | no        |           |                     |                        |                                                  |
| glfAW       | Vancomycin-sulfonyl glycosyltransferase | P9606                                   | Amphibacillus oryzae | Bacteria             | E. coli  | 1B15       | 2001                   |                      | GT-B                     | inverting  | no        |           |                     |                        |                                                  |
| glfAX       | Vancomycin-sulfonyl glycosyltransferase | P9607                                   | Amphibacillus oryzae | Bacteria             | E. coli  | 1B16       | 2001                   |                      | GT-B                     | inverting  | no        |           |                     |                        |                                                  |
| glfAY       | Vancomycin-sulfonyl glycosyltransferase | P9608                                   | Amphibacillus oryzae | Bacteria             | E. coli  | 1B17       | 2001                   |                      | GT-B                     | inverting  | no        |           |                     |                        |                                                  |
| glfAZ       | Vancomycin-sulfonyl glycosyltransferase | P9609                                   | Amphibacillus oryzae | Bacteria             | E. coli  | 1B18       | 2001                   |                      | GT-B                     | inverting  | no        |           |                     |                        |                                                  |
| glfBA       | Vancomycin-sulfonyl glycosyltransferase | P9610                                   | Amphibacillus oryzae | Bacteria             | E. coli  | 1B19       | 2001                   |                      | GT-B                     | inverting  | no        |           |                     |                        |                                                  |
| glfBB       | Vancomycin-sulfonyl glycosyltransferase | P9611                                   | Amphibacillus oryzae | Bacteria             | E. coli  | 1B20       | 2001                   |                      | GT-B                     | inverting  | no        |           |                     |                        |                                                  |
| glfBC       | Vancomycin-sulfonyl glycosyltransferase | P9612                                   | Amphibacillus oryzae | Bacteria             | E. coli  | 1B21       | 2001                   |                      | GT-B                     | inverting  | no        |           |                     |                        |                                                  |
| glfBD       | Vancomycin-sulfonyl glycosyltransferase | P9613                                   | Amphibacillus oryzae | Bacteria             | E. coli  | 1B22       | 2001                   |                      | GT-B                     | inverting  | no        |           |                     |                        |                                                  |
| glfBE       | Vancomycin-sulfonyl glycosyltransferase | P9614                                   | Amphibacillus oryzae | Bacteria             | E. coli  | 1B23       | 2001                   |                      | GT-B                     | inverting  | no        |           |                     |                        |                                                  |
| glfBF       | Vancomycin-sulfonyl glycosyltransferase | P9615                                   | Amphibacillus oryzae | Bacteria             | E. coli  | 1B24       | 2001                   |                      | GT-B                     | inverting  | no        |           |                     |                        |                                                  |
| glfBG       | Vancomycin-sulfonyl glycosyltransferase | P9616                                   | Amphibacillus oryzae | Bacteria             | E. coli  | 1B25       | 2001                   |                      | GT-B                     | inverting  | no        |           |                     |                        |                                                  |
| glfBH       | Vancomycin-sulfonyl glycosyltransferase | P9617                                   | Amphibacillus oryzae | Bacteria             | E. coli  | 1B26       | 2001                   |                      | GT-B                     | inverting  | no        |           |                     |                        |                                                  |
| glfBI       | Vancomycin-sulfonyl glycosyltransferase | P9618                                   | Amphibacillus oryzae | Bacteria             | E. coli  | 1B27       | 2001                   |                      | GT-B                     | inverting  | no        |           |                     |                        |                                                  |
| glfBJ       | Vancomycin-sulfonyl glycosyltransferase | P9619                                   | Amphibacillus oryzae | Bacteria             | E. coli  | 1B28       | 2001                   |                      | GT-B                     | inverting  | no        |           |                     |                        |                                                  |
| glfBK       | Vancomycin-sulfonyl glycosyltransferase | P9620                                   | Amphibacillus oryzae | Bacteria             | E. coli  | 1B29       | 2001                   |                      | GT-B                     | inverting  | no        |           |                     |                        |                                                  |
| glfBL       | Vancomycin-sulfonyl glycosyltransferase | P9621                                   | Amphibacillus oryzae | Bacteria             | E. coli  | 1B30       | 2001                   |                      | GT-B                     | inverting  | no        |           |                     |                        |                                                  |
| glfBM       | Vancomycin-sulfonyl glycosyltransferase | P9622                                   | Amphibacillus oryzae | Bacteria             | E. coli  | 1B31       | 2001                   |                      | GT-B                     | inverting  | no        |           |                     |                        |                                                  |
| glfBN       | Vancomycin-sulfonyl glycosyltransferase | P9623                                   | Amphibacillus oryzae | Bacteria             | E. coli  | 1B32       | 2001                   |                      | GT-B                     | inverting  | no        |           |                     |                        |                                                  |
| glfBO       | Vancomycin-sulfonyl glycosyltransferase | P9624                                   | Amphibacillus oryzae | Bacteria             | E. coli  | 1B33       | 2001                   |                      | GT-B                     | inverting  | no        |           |                     |                        |                                                  |
| glfBP       | Vancomycin-sulfonyl glycosyltransferase | P9625                                   | Amphibacillus oryzae | Bacteria             | E. coli  | 1B34       | 2001                   |                      | GT-B                     | inverting  | no        |           |                     |                        |                                                  |
| glfBQ       | Vancomycin-sulfonyl glycosyltransferase | P9626                                   | Amphibacillus oryzae | Bacteria             | E. coli  | 1B35       | 2001                   |                      | GT-B                     | inverting  | no        |           |                     |                        |                                                  |
| glfBR       | Vancomycin-sulfonyl glycosyltransferase | P9627                                   | Amphibacillus oryzae | Bacteria             | E. coli  | 1B36       | 2001                   |                      | GT-B                     | inverting  | no        |           |                     |                        |                                                  |
| glfBS       | Vancomycin-sulfonyl glycosyltransferase | P9628                                   | Amphibacillus oryzae | Bacteria             | E. coli  | 1B37       | 2001                   |                      | GT-B                     | inverting  | no        |           |                     |                        |                                                  |
| glfBT       | Vancomycin-sulfonyl glycosyltransferase | P9629                                   | Amphibacillus oryzae | Bacteria             | E. coli  | 1B38       | 2001                   |                      | GT-B                     | inverting  | no        |           |                     |                        |                                                  |
| glfBU       | Vancomycin-sulfonyl glycosyltransferase | P9630                                   | Amphibacillus oryzae | Bacteria             | E. coli  | 1B39       | 2001                   |                      | GT-B                     | inverting  | no        |           |                     |                        |                                                  |
| glfBV       | Vancomycin-sulfonyl glycosyltransferase | P9631                                   | Amphibacillus oryzae | Bacteria             | E. coli  | 1B40       | 2001                   |                      | GT-B                     | inverting  | no        |           |                     |                        |                                                  |
| glfBW       | Vancomycin-sulfonyl glycosyltransferase | P9632                                   | Amphibacillus oryzae | Bacteria             | E. coli  | 1B41       | 2001                   |                      | GT-B                     | inverting  | no        |           |                     |                        |                                                  |
| glfBX       | Vancomycin-sulfonyl glycosyltransferase | P9633                                   | Amphibacillus oryzae | Bacteria             | E. coli  | 1B42       | 2001                   |                      | GT-B                     | inverting  | no        |           |                     |                        |                                                  |
| glfBY       | Vancomycin-sulfonyl glycosyltransferase | P9634                                   | Amphibacillus oryzae | Bacteria             | E. coli  | 1B43       | 2001                   |                      | GT-B                     | inverting  | no        |           |                     |                        |                                                  |
| glfBZ       | Vancomycin-sulfonyl glycosyltransferase | P9635                                   | Amphibacillus oryzae | Bacteria             | E. coli  | 1B44       | 2001                   |                      | GT-B                     | inverting  | no        |           |                     |                        |                                                  |
| glfCA       | Vancomycin-sulfonyl glycosyltransferase | P9636                                   | Amphibacillus oryzae | Bacteria             | E. coli  | 1B45       | 2001                   |                      | GT-B                     | inverting  | no        |           |                     |                        |                                                  |
| glfCB       | Vancomycin-sulfonyl glycosyltransferase | P9637                                   | Amphibacillus oryzae | Bacteria             | E. coli  | 1B46       | 2001                   |                      | GT-B                     | inverting  | no        |           |                     |                        |                                                  |
| glfCC       | Vancomycin-sulfonyl glycosyltransferase | P9638                                   | Amphibacillus oryzae | Bacteria             | E. coli  | 1B47       | 2001                   |                      | GT-B                     | inverting  | no        |           |                     |                        |                                                  |
| glfCD       | Vancomycin-sulfonyl glycosyltransferase | P9639                                   | Amphibacillus oryzae | Bacteria             | E. coli  | 1B48       | 2001                   |                      | GT-B                     | inverting  | no        |           |                     |                        |                                                  |
| glfCE       | Vancomycin-sulfonyl glycosyltransferase | P9640                                   | Amphibacillus oryzae | Bacteria             | E. coli  | 1B49       | 2001                   |                      | GT-B                     | inverting  | no        |           |                     |                        |                                                  |
| glfCF       | Vancomycin-sulfonyl glycosyltransferase | P9641                                   | Amphibacillus oryzae | Bacteria             | E. coli  | 1B50       | 2001                   |                      | GT-B                     |            |           |           |                     |                        |                                                  |
